## Heterogeneous changes in mobility in response to the SARS-CoV-2 Omicron BA.2 outbreak in Shanghai

Juanjuan Zhang<sup>1,\*</sup>, Suoyi Tan<sup>2,\*</sup>, Cheng Peng<sup>1</sup>, Xiangyanyu Xu<sup>1</sup>, Mengning Wang<sup>2</sup>, Wanying Lu<sup>1</sup>, Yanpeng Wu<sup>1</sup>, Bin Sai<sup>2</sup>, Mengsi Cai<sup>2</sup>, Allisandra G. Kummer<sup>3</sup>, Zhiyuan Chen<sup>1</sup>, Junyi Zou<sup>1</sup>, Wenxin Li<sup>1</sup>, Wen Zheng<sup>1</sup>, Yuxia Liang<sup>1</sup>, Yuchen Zhao<sup>1</sup>, Alessandro Vespignani<sup>4</sup>, Marco Ajelli<sup>3,†</sup>, Xin Lu<sup>2,5,†,#</sup>, Hongjie Yu<sup>1,†,#</sup>

1. School of Public Health, Fudan University, Key Laboratory of Public Health Safety, Ministry of Education, Shanghai, China
2. College of Systems Engineering, National University of Defense Technology, Changsha, China
3. Laboratory for Computational Epidemiology and Public Health, Department of Epidemiology and Biostatistics, Indiana University School of Public Health, Bloomington, IN, USA
4. Laboratory for the Modeling of Biological and Socio-technical Systems, Northeastern University, Boston, MA, USA
5. Department of Public Health Sciences, Karolinska Institutet, Stockholm, Sweden

\*These authors contributed equally to this work.

†These authors are joint senior authors contributed equally to this work.

#Corresponding authors: Xin Lu, College of Systems Engineering, National University of Defense Technology, Changsha 410073, China, Email: [xin.lu@flowminder.org](mailto:xin.lu@flowminder.org), and Hongjie Yu, Fudan University, School of Public Health, Key Laboratory of Public Health Safety, Ministry of Education, Shanghai 200032, China, E-mail: [yhj@fudan.edu.cn](mailto:yhj@fudan.edu.cn)

**Author Contributions:** H.Y. and X.L. designed the experiments. J.Z., C.P., X.X., J.Y.Z., W.L., and Y.L. collected and cleaned the data. J.Z., S.T., C.P., X.X., B.S., M.C., W.L., M.W., Y.W., Z.C., W.Z., and Y.Z. analyzed the data. J.Z., S.T., A.K., A.V., M.A., X.L., and H.Y. interpreted the results. J.Z., S.T., H.Y., X.L., and M.A. wrote the manuscript. A.K. and A.V. edited and revised the manuscript.

**Competing Interest Statement:** H.Y. has received research funding from Sanofi Pasteur, GlaxoSmithKline, Yichang HEC Changjiang, Shanghai Roche Pharmaceutical Company, and SINOVAC Biotech Ltd. M.A. has received

research funding from Seqirus. None of those research funding is related to this work. All other authors declare no competing interests.

**Classification:** Physical Sciences, Applied Physical Sciences; Biological Science, Population Biology

**Keywords:** human mobility, COVID-19, mobile phones

## **Abstract**

The coronavirus disease 2019 (COVID-19) pandemic and the measures taken by authorities to control its spread had altered human behavior and mobility patterns in an unprecedented way. However, it remains unclear whether the population response to a COVID-19 outbreak varies within a city or among demographic groups. Here we utilized passively recorded cellular signaling data at a spatial resolution of 1km x 1km for over 5 million users and epidemiological surveillance data collected during the SARS-CoV-2 Omicron BA.2 outbreak from February to June 2022 in Shanghai, China, to investigate the heterogeneous response of different segments of the population at the within-city level and examine its relationship with the actual risk of infection. Changes in behavior were spatially heterogeneous within the city and population groups, and associated with both the infection incidence and adopted interventions. We also found that males and individuals aged 30-59 years old traveled more frequently, traveled longer distances, and their communities were more connected; the same groups were also associated with the highest SARS-CoV-2 incidence. Our results highlight the heterogeneous behavioral change of the Shanghai population to the SARS-CoV-2 Omicron BA.2 outbreak and its effect on the heterogeneous spread of COVID-19, both spatially and demographically. These findings could be instrumental for the design of targeted interventions for the control and mitigation of future outbreaks of COVID-19 and, more broadly, of respiratory pathogens.

### **Significance Statement**

Our study utilized passively recorded cellular signaling data and epidemiological surveillance data to investigate the changes human mobility to a COVID-19 outbreak at an unprecedented within-city level and examine its relationship with the actual risk of infection. Our findings highlight the heterogeneous behavioral change of the Shanghai population to the 2022 SARS-CoV-2 Omicron BA.2 outbreak and its heterogenous effect on the SARS-CoV-2 spread, both spatially and demographically. The implications of our findings could be instrumental to inform spatially targeted interventions at the within-city scale to mitigate possible new surges of COVID-19 cases as well as fostering preparedness for future respiratory infections disease outbreaks.

1 **Main Text**

2

3 **Introduction**

4 Following the initial COVID-19 wave in early 2020, mainland China adopted  
5 stringent measures, often referred to as the "zero-COVID" strategy, to curb  
6 COVID-19 outbreaks(1). This approach effectively minimized SARS-CoV-2  
7 transmission in China until the emergence of the Omicron variant in late  
8 2021(2). Subsequently, several Omicron outbreaks occurred, with a  
9 significant outbreak in Shanghai, identified in March 2022, accounting for  
10 over 600,000 confirmed infections(3). Comprehensive PCR testing, citywide  
11 lockdowns, and additional measures to restrict interpersonal interactions  
12 were implemented, ultimately containing the outbreak by June 2022. China  
13 eventually abandoned the "zero-COVID" policy six months later(4).

14

15 Human mobility patterns, ranging from international travel to daily commuting,  
16 significantly influence the spread of infectious diseases due to the nature of  
17 interpersonal interactions(5-10). Recent years have seen an exponential  
18 growth in geolocated datasets that provide unprecedented levels of detail to  
19 quantify human mobility(10-19). In particular, data collected from mobile  
20 devices has extensively been used in the early phase of the COVID-19  
21 pandemic to investigate transmission dynamics, estimate changes in contact  
22 patterns as a result of public health interventions, and forecast epidemic  
23 spread(11, 13, 18, 19). However, limitations in the epidemiological and  
24 mobility data analyzed (e.g., varying COVID-19 reporting rates by age,  
25 incomplete demographic information for individual travel trajectories) have  
26 left several key questions regarding the relationships between epidemic  
27 spread, implemented interventions, and human behavior and mobility  
28 unanswered. In particular, it remains unclear whether population responses  
29 to a COVID-19 outbreak, as measured by travel frequency, distance traveled,  
30 and population connectivity, vary within a city (e.g., by district area) or among  
31 demographic groups (e.g., by age and sex).

32

33 To address these knowledge gaps, we utilized passively recorded Cellular  
34 Signaling Data (CSD) from over 5 million users (approximately 20% of  
35 Shanghai's population) and epidemiological surveillance data collected  
36 during the SARS-CoV-2 Omicron outbreak in Shanghai. The exceptional  
37 scale and resolution of the human mobility data enabled us to analyze  
38 micro-level changes in mobility within the city and among different population  
39 groups (e.g., age and sex). Additionally, the repeated city-wide PCR  
40 screenings provided an opportunity to examine the association between  
41 these behavioral shifts and high-quality epidemiological data in the unique  
42 context of Shanghai's 2022 Omicron outbreak.

43

## 44 **Results**

### 45 **Omicron outbreak in Shanghai and public health response**

46 In early March 2022, Shanghai experienced a significant outbreak of the  
47 SARS-CoV-2 Omicron variant, which rapidly spread among its 25 million  
48 residents. Throughout the outbreak, authorities conducted multiple mass  
49 PCR screenings; by the end of the outbreak on June 30, 2022, they had  
50 identified a total of 627,132 SARS-CoV-2 infections (see Fig. 1a). During the  
51 outbreak's initial phase, authorities implemented grid management and  
52 partial lockdowns at the subdistrict level. On March 28, eastern Shanghai,  
53 consisting of subdistricts east of the Huangpu River (see SI Appendix, Fig.  
54 S1a), entered a population-wide lockdown, followed by a citywide lockdown  
55 for the rest of Shanghai on April 1. The citywide lockdown was lifted entirely  
56 on June 1, 2022, when the daily number of newly reported infections dropped  
57 to 10. Further information on the public health response can be found in the  
58 Methods, SI Appendix, Fig. S2, and SI Appendix, Table S2.

59

### 60 **Changes in frequency of travel, distance traveled, and mobility network 61 community structure over the course of the outbreak**

62 We quantified spontaneous and intervention-induced behavioral changes of  
63 the Shanghai population in terms of their daily mobility patterns based on  
64 CSD. During the study period (see SI Appendix, Fig. S1e), we analyzed an  
65 average of 5.04 million users accounting for 27% of all mobile phone users in  
66 Shanghai (20% of the total population). We estimated aggregated mobility  
67 flows, defined as the number of trips between two locations where a user  
68 spends at least 30 minutes, at a spatial resolution of 1km x 1km (see SI  
69 Appendix, Fig. S1d). This was done using a grid comprising 7,355 cells that  
70 covered the entire city of Shanghai, including all of its 16 districts and 216  
71 subdistricts (see SI Appendix, Fig. S1a). The geographical distance between  
72 the cell centroids it is assumed to estimate the travel distance. Subsequently,  
73 we employed the Infomap method(20) to identify community structures within  
74 the mobility networks. Further details can be found in the Methods section  
75 and SI Appendix Section 1.

76

77 **Pre-outbreak Phase.** During the two weeks before the Omicron outbreak  
78 began, we estimated an average of 1.36 trips per individual per day,  
79 corresponding to a total of 7.03 million trips per day (see Fig. 1a).  
80 Approximately, 33.4% of the grids in the central urban areas accounted for  
81 80% of the total mobility in Shanghai (see Fig. 1b). The median distance  
82 traveled was 6.04 km; trips within 10 km accounted for 66.7% of all trips (see  
83 Fig. 1c and d). We identified 22 total communities, with a sizable core  
84 community (~65.3% of Shanghai's land area) at the city's center, surrounded  
85 by peripheral communities outside the Shanghai metropolitan area (see Fig.  
86 2a and SI Appendix, Fig. 3a and f).

87

88 **Targeted interventions Phase.** After the implementation of public places  
89 closures, school closures, mass screenings, and travel restrictions beginning  
90 on March 2, the number of daily trips decreased from 1.36 to 0.88 (see Fig.  
91 1a). Long-distance trips, defined as those exceeding 30 km, experienced the  
92 most substantial decrease, dropping by approximately 47.5% compared to  
93 the pre-outbreak phase. This reduction brought the median travel distance  
94 down to 5.09 km (see Fig. 1c and d and SI Appendix, Fig. S4a). By the end of  
95 the targeted interventions phase, the number of communities within the  
96 mobility network had increased to around 50 (see Fig. 2b and SI Appendix,  
97 Fig. S3b and f).

98  
99 **Citywide lockdown Phase.** After a citywide lockdown was implemented on  
100 April 1, mobility decreased by 87.5% compared to the pre-outbreak phase  
101 and remained stable for about a month (see Fig. 1a). The median travel  
102 distance decreased to 1.21 km, with 79.0% of trips spanning less than 3 km  
103 (see Fig. 1c and d and SI Appendix, Fig. S4a). The initial 22 communities  
104 fragmented into 180 smaller ones, effectively dismantling the core-periphery  
105 structure that connected various parts of the city (see Fig. 2c and SI  
106 Appendix, Fig. S3c and f).

107  
108 **Targeted lifting of interventions Phase.** Coinciding with the partial lifting of  
109 interventions on May 1, data revealed a gradual increase in mobility,  
110 reaching 19.1% of pre-outbreak levels. Meanwhile, the median distance  
111 traveled per day rose to approximately half of what it was in the pre-outbreak  
112 phase (see Fig. 1a and c). The number of distinct communities decreased to  
113 75 with a ramping up of the strength of connections across different regions  
114 of the city (see Fig. 2d and SI Appendix, Fig. S3d and f).

115  
116 **Reopening Phase.** Upon lifting most interventions on June 1, we observed  
117 an immediate resurgence in mobility flows, reaching 91.2% of pre-outbreak  
118 levels in under a week (see Fig. 1a). Short-distance trips (<3 km) increased  
119 more rapidly, exceeding pre-outbreak levels, while long-distance trips only  
120 recovered to about half of their pre-outbreak frequency. By June 30, the  
121 median trip distance had not returned to its level during targeted  
122 interventions (4.24 km vs. 5.09 km), although the number of daily trips had  
123 almost reverted to pre-outbreak figures (see Fig. 1c and SI Appendix, Fig.  
124 S4a). Ongoing mandatory COVID-19 tests for travel outside residential areas  
125 within the city, along with additional policies, prevented the community  
126 structure from fully reverting to its pre-outbreak state (43 vs. 22 communities)  
127 (see Fig. 2e and SI Appendix, Fig. S3e and f).

128  
129 **Spatially heterogeneous impact of the epidemic and the adopted**  
130 **interventions**



131 Before the lockdown of eastern Shanghai, mobility reductions were  
132 heterogeneous across regions, with larger reductions observed in regions  
133 severely hit by the epidemic (see Fig. 3a). Regions with more than 50  
134 infections exhibited an average mobility reduction of 78.7%, while the  
135 reduction was just 13.0% for regions without infections (see Fig. 3b). During  
136 the targeted lifting of interventions phase, particularly after May 16 when  
137 public transportation began to resume, strict mobility-restricting policies  
138 persisted in high-risk areas with sustained incidence rates. In contrast,  
139 substantial rebounds in mobility were observed in low-risk regions,  
140 encompassing both suburban and rural areas of Shanghai (see Fig. 3c).  
141 Regions with more than 50 infections had a very low recovery of mobility  
142 (12.6% on average), while the recovery reached 84.1% for regions without  
143 infections (see Fig. 3d).

144

#### 145 **Changes in frequency of travel, distance traveled, and mobility network** 146 **community structure by demographic characteristics**

147 To calculate the mobility and community structure by demographic  
148 characteristics, we analyzed mobility flows separately by age group and sex.  
149 The range of mobility was measured by the proportion of the area covered by  
150 the top ten communities ( $\alpha$ ), the total number of identified communities  
151 ( $NC$ ), and the number of communities covering more than ten grid cells  
152 ( $NC_{g \geq 10}$ ). Based on the individual-level data of infected individuals reported  
153 between March 1 and March 25 (targeted interventions phase), we analyzed  
154 the relationship between mobility patterns and the incidence of SARS-CoV-2  
155 as well as the number of cells with reported infections by demographic  
156 characteristics.

157

158 During the pre-outbreak phase, number of daily trips and distance travelled  
159 were highest for adults aged 30-59 years (6.20 km; 1.46 trips) and lowest for  
160 older adults aged 70+ (4.35 km; 0.60 trips) (see Fig. 4a and SI Appendix, Fig.  
161 S4b). Compared with middle-aged adults aged 30-59, individuals 0-18 years  
162 old travelled 38.2% less frequently and 23.6% shorter distances, and  
163 correspondingly had a 38.7% lower incidence and 58.0% less infected cells  
164 during the targeted interventions phase. For all age groups, higher mobility  
165 was correlated with higher infection incidence, and longer travel distances  
166 were correlated with larger infected areas (see SI Appendix, Table S7 and 8).  
167 Neither travel distance nor travel volume were obviously different across all  
168 age groups during the citywide lockdown; however, they quickly rebounded  
169 to the pre-outbreak level during the reopening phase (see Fig. 4b and c).  
170 Different age groups also presented significant differences in mobility  
171 network patterns across phases (see Fig. 4d-g). Middle-aged groups (30-59  
172 years old) visited substantially more locations than younger or older groups;  
173 for example, the average degree  $\langle k \rangle$  for middle-aged groups was 40 times  
174 that for 16-18 years old. Similarly, the mobility networks of middle-aged



175 groups were more densely connected, with higher transitivity (adjacent  
176 neighboring locations) (see SI Appendix, Table S6). This difference was  
177 more prominent in community structures. For example, younger and older  
178 groups had smaller and less connected communities ( $\alpha=5.93\%$ ,  $NC=319$ ,  
179  $\alpha=6.88\%$ ,  $NC=369$ , respectively), whereas middle-aged groups had fewer  
180 well-connected communities covering large areas ( $\alpha=37.25\%$ ,  $NC=142$ )  
181 (see SI Appendix, Fig. S5). The lockdown reduced the connection of the  
182 mobility networks for all age groups (see Fig. 4e).

183  
184 Males were associated with longer travel distance (6.08 km vs. 5.81 km) and  
185 30.6% higher daily trips than females during the pre-outbreak phase (see Fig.  
186 4a and SI Appendix, Fig. S4c), which was associated with 9.7% higher  
187 incidence and 7.3% more infected cells than female during the targeted  
188 interventions phase (see SI Appendix, Table S7 and 8). There was no  
189 difference in mobility between males and females during citywide lockdown.  
190 The travel distance remained comparable across sexes (see Fig. 4b-c). Sex  
191 was also a strong factor affecting the mobility network patterns. During the  
192 pre-outbreak phase, males had a greater range of mobility and smaller  
193 community sizes ( $\alpha=36.95\%$ ,  $NC=148$ ) than females ( $\alpha=31.37\%$ ,  
194  $NC=205$ ), indicating that males traveled more frequently and distantly than  
195 females. This difference persisted across all epidemic phases (see Fig. 4d-f  
196 and SI Appendix, Fig. S5).

#### 197 198 **Additional analyses at different spatial and temporal resolutions**

199 Additionally, we compared changes in frequency of daily trips at the grid,  
200 subdistrict, and district levels. Trips between subdistricts or districts exhibited  
201 higher reduction in mobility during the citywide lockdown for the subdistrict  
202 (91.3%) and district levels (95.4%) compared to the grid (1km $\times$ 1km cells)  
203 level (87.5%) (see SI Appendix, Fig. S6a and SI Appendix, Table S9). We  
204 also observed a less marked reopening rebound of the mobility, reaching  
205 79.1% and 69.2% of the pre-outbreak flows, respectively, for the subdistrict  
206 and district levels compared to 91.2% at the grid level. We then compared  
207 the proportion of daily population flows at different spatial resolutions,  
208 including inter-flow and intra-flow, where the inter-flow denotes the  
209 population flows between cells (or subdistricts, districts) and the intra-flow  
210 represents population flows within the same cell (or subdistrict, district). Our  
211 results show different patterns under different resolutions (see SI Appendix,  
212 Fig. S6b-d). Low-resolution mobility data may thus mask the variability in the  
213 dynamics of mobility flows.

214  
215 We further investigated alterations in mobility and commuting patterns at  
216 various temporal resolutions. The periodic weekly commuting pattern swiftly  
217 rebounded during the reopening phase, even though the frequency of travel,  
218 distance traveled, and community structure had not fully recovered. Notably,

219 we observed significant differences in travel frequency, distance traveled,  
220 and community structure of mobility networks between weekdays and  
221 weekends, as well as at different times of the day. For more details, refer to  
222 the SI Appendix Section 4 and SI Appendix, Fig. S7-9 for details.

223

## 224 **Discussion**

225 Our analysis provided an in-depth assessment of the behavioral changes  
226 within the Shanghai population in response to the 2022 SARS-CoV-2  
227 Omicron outbreak, considering fine spatial and temporal scales as well as  
228 demographic characteristics.

229

230 Pre-outbreak mobility was unevenly distributed across the city, with 33.4% of  
231 grids located in the center of Shanghai accounting for 80% of all trips. This is  
232 consistent with the geographical distribution of population density in  
233 Shanghai. The crowd movement during the pre-outbreak phase reveals the  
234 specific socio-economic distribution and commuting patterns in Shanghai.  
235 Mobility reductions were also spatially heterogeneous from the targeting  
236 interventions phase through the reopening phase, as different policies were  
237 adopted according to the local epidemic situation. Larger reductions were  
238 measured in regions more severely hit by the epidemic. These findings hint  
239 to possible spontaneous behavioral changes where individuals witnessing a  
240 large number of infections reported in their region might have limited their  
241 mobility beyond the mandated restrictions compared with those living in less  
242 affected regions. When the citywide lockdown entered into effect, the  
243 situation became homogenous as mobility reached its minimum level in all  
244 areas.

245

246 Throughout the outbreak, the frequency of travel and distance traveled  
247 generally adhered to the timeline of interventions implemented to combat the  
248 spread of SARS-CoV-2. Mobility reached its lowest level during the citywide  
249 lockdown phase, with an average of 0.17 trips per day and 1.21 km traveled.  
250 The community structure identified by the mobility flows followed the same  
251 pattern as well, with the population fragmenting into an increasing number of  
252 smaller communities as the level of intervention intensified. Mobility and  
253 community size quickly rebounded within the first week after interventions  
254 were lifted, although in the following month they had not fully recovered to  
255 pre-outbreak levels. During the outbreak, changes in behavior were spatially  
256 heterogeneous within the city and directly associated with both the epidemic  
257 situation and interventions. We observed that males and individuals aged  
258 30-59 years old traveled more frequently, traveled longer distances, and their  
259 communities were more connected, which were associated with higher  
260 incidence of SARS-CoV-2 infections and larger infected areas.

261

262 In late May, public transportation was partially reopened, and individuals  
263 living in less affected regions were allowed conditional trips (e.g., one  
264 individual per household per day was allowed to buy necessities). During the  
265 reopening phase, we found that mobility quickly rebounded within the first  
266 week (although it did not return to the pre-outbreak level). This recovering  
267 trend is substantially different from some European and US locations where  
268 the rebound was much slower, possibly due to the persistence of the  
269 epidemic or different levels of lockdown fatigue(12, 17, 21, 22). Within the  
270 Shanghai population, we found a slower mobility recovery during reopening  
271 among older adults (70+ years), which suggests possible spontaneous  
272 choices to limit mobility to minimize the risk of infection given widespread  
273 information about the increased risk of developing severe symptoms by age  
274 if infected. At the same time, it is also possible that the policy of requiring a  
275 negative PCR results within 72 hours to travel within the city (but outside their  
276 residential area) may have contributed to a reduced mobility among older  
277 adults as they are less likely to use smart phones to show proof of negative  
278 test result(23).

279  
280 One interesting aspect of our analysis is that we have observed a spatially  
281 heterogeneous response to the outbreak. Although this was already found in  
282 previous country-level analyses(17, 24-26), here we are observing marked  
283 differences at the within-city scale. Our analysis is also showing that at the  
284 within-city scale, results are generally consistent if data is analyzed at 1 km<sup>2</sup>  
285 resolution or using administrative boundaries (e.g., district, subdistrict),  
286 although quantitative differences to exists, highlighting the importance of  
287 selecting the appropriate spatial level of aggregation of mobility data  
288 depending on the focus research question. Moreover, we found that  
289 interventions altered not only the number of trips but also their length. In  
290 particular, after the lockdown was lifted, we observed an increase in trips  
291 under 3 km as compared to pre-outbreak mobility. These heterogeneous  
292 patterns may be useful for informing spatially targeted interventions at the  
293 within-city scale.

294  
295 While mobile phone data is widely used to quantify human mobility, there are  
296 potential sources of inaccuracy to consider, such as i) population  
297 representativeness (e.g., by age), ii) geographical coverage, and iii)  
298 heterogeneity in user activity. First, our study may be subject to selection  
299 bias, as we analyzed the mobility of mobile phone owners, which could  
300 exclude or underrepresent young children and older adults (see SI Appendix,  
301 Fig. S1h and SI Appendix Section 1). However, despite this affecting our  
302 population-level results, we have provided an assessment by age and sex  
303 that does not suffer from this bias. Second, we analyzed data representing  
304 approximately 20% of Shanghai's population, with a median coverage by  
305 subdistrict of 19.5% (interquartile range: 14.9%-24.7%) (see SI Appendix, Fig.

306 S1c). Third, by relying on passively recorded cellular signaling data instead  
307 of actively recorded signals, we have mitigated the bias of heterogeneity in  
308 user activity. Another limitation is that the number of infections disaggregated  
309 by location, age, and sex is available to us only until March 25, 2022. This  
310 constraint limited our comparison between epidemiological data and human  
311 mobility patterns to the initial two phases of the outbreak.

312  
313 In summary, behavioral changes during the 2022 Omicron outbreak were  
314 heterogeneous, both spatially and demographically. By shedding light on the  
315 varied responses among population groups, our findings can be instrumental  
316 in guiding the development of spatially targeted interventions to mitigate  
317 potential new surges in COVID-19 cases, as well as fostering preparedness  
318 for future respiratory infectious disease outbreaks.

## 319 **Materials and Methods**

### 320 **Data sources**

321 Mobile phone data. Cellular Signaling Data (CSD) were provided by China  
322 Unicom, one of the largest national mobile carriers in China, which accounts  
323 for approximately one-third of all active mobile phone users in Shanghai.  
324 Active signaling data was recorded during events such as phone calls, text  
325 messages, device power on/off, or tower switches, while passive signaling  
326 data captured the user's location approximately every 30 minutes, provided  
327 the phone was turned on. The analyzed CSD data includes the timestamp of  
328 each event and a unique identifier for the mobile phone tower routing the  
329 activity. The data spans from February 15, 2022, to June 30, 2022, and  
330 consists of an average of 5.04 million phone users per day throughout the  
331 study period.

332  
333  
334 Epidemiological data. Daily aggregated data on the number of infections and  
335 individual-level data (line list) of all SARS-CoV-2 infections were extracted  
336 from multiple publicly available official data sources (websites of municipal  
337 health commission and local government media) as detailed in our previous  
338 study(3). The age and sex information are available only for infected  
339 individuals reported between March 1-March 25, 2022.

### 340 **Timeline of the outbreak and public health response**

341 After the outbreak was initially reported on March 1, 2022, a series of  
342 non-pharmaceutical interventions (NPIs) were implemented to suppress  
343 transmission. Schools closed on March 12. From March 16 to 27, Shanghai  
344 introduced grid management by dividing subdistricts into high-risk and  
345 non-high-risk areas, based on factors such as the epidemiological situation  
346 (number of infections and cases), population density, social characteristics,  
347 and economic activity. High-risk areas underwent one or two rounds of  
348

349 population-wide PCR screening within 48 hours, accompanied by lockdown  
350 orders. Non-high-risk areas conducted a single round of mass screening.

351

352 On March 28, eastern Shanghai (comprising subdistricts east of the Huangpu  
353 River, see SI Appendix, Fig. S1a) entered a population-wide lockdown,  
354 followed by the rest of Shanghai on April 1 (citywide lockdown). Key  
355 enterprises and public transportation began resuming operations in May, with  
356 the citywide lockdown fully lifted on June 1. However, some restrictions  
357 persisted throughout June, limiting population movement. For instance,  
358 entering public places and transportation required proof of a negative PCR  
359 test result within 72 hours, and restaurants prohibited dine-in service until  
360 June 29. Additional details on the public health response can be found in SI  
361 Appendix, Fig. S2 and SI Appendix, Table S2.

362

### 363 **Definition of the five phases of the outbreak**

364 For the purposes of this analysis, we categorized the outbreak into five  
365 phases based on the implemented interventions and the epidemic situation.  
366 The first phase, known as the "pre-outbreak phase," spanned from February  
367 15 to February 28, 2022. During this period, only a small number of sporadic  
368 and locally transmitted cases were recorded, and people's daily activities  
369 remained largely unaffected. The period from February 1 to February 14 was  
370 excluded from our analysis as it is overlapped with the Chinese New Year  
371 holiday. The second phase is the "targeted interventions phase", covering the  
372 period from March 1 to March 31, when spatially targeted NPIs were  
373 deployed to suppress transmission. The third phase is the "citywide lockdown  
374 phase", covering the period from April 1 to April 30, when the entire city was  
375 in lockdown. The fourth phase is the "targeted lifting of interventions phase",  
376 covering the period from May 1 to May 31, when restrictions started to  
377 gradually scale-down in specific areas of the city. The last phase is the  
378 "reopening phase", covering the period from June 1 to June 30, when policies  
379 started to be lifted throughout the entire city.

380

### 381 **Frequency and distance of daily trips**

382 A trip was counted when a user switched to one or more new cell towers,  
383 until the user became stationary again (no further switch for approximately 30  
384 min). We only consider trips between different cells of the grid. We defined as  
385  $T_{ij}(t)$  the number of trips between grid  $j$  and grid  $i$  at time  $t$ . The average  
386 number of trips per individual at time  $t$  was thus defined as  $\langle T \rangle(t) =$   
387  $T(t)/U(t)$ , where  $T(t) = \sum_{i \neq j} T_{ij}(t)$  represents the total number of trips at  
388 time  $t$ , and  $U(t)$  represents the number of active users at time  $t$  (which  
389 dynamically changes over time due to the flow of commuter to and from  
390 Shanghai). To quantify to what extent mobility changed during the outbreak,  
391 we compare the mobility during different epidemic phases to a baseline  
392 phase with pre-outbreak mobility. Estimates were disaggregated by age, sex,



393 day type (i.e., weekday and weekend), and time of the day (i.e., daytime and  
394 nighttime).

395

### 396 **Definition of the mobility network and community detection**

397 To investigate structural changes in the mobility network throughout various  
398 stages of the outbreak, we reconstructed the mobility network  $G_P$  for each  
399 phase  $P$ . In this network, each node represents a cell of the grid, with  
400 directed edges connecting nodes where users move between cell  $i$  and cell  
401  $j$ . The degree of node  $i$  is then defined by  $k_i = k_i^{in} + k_i^{out}$ , where  $k_i^{in} =$

402  $\sum_j C_{ji}$ , and  $k_i^{out} = \sum_j C_{ij}$ , where  $C_{ji}$  indicates whether node  $j$  is connected to

403 node  $i$  or not (i.e., users travel from node  $j$  to node  $i$ ). The average degree  $\langle k \rangle$

404 is then calculated as  $\langle k \rangle = \sum_{i=1}^n k_i / n$ , where  $n$  is the number of nodes. The

405 number of days in each phase  $P$  is denoted by  $D_P$ . Subsequently, the edge

406 weights  $w_{ij}(P)$  are calculated as the average daily number of trips between

407 cells during this phase as  $w_{ij}(P) = \sum_{t \in D_P} F_{ij}(t) / |D_P|$ . We exclude edges

408 whose average weight is below the threshold  $w_{ij}(D) < 1$ .

409

410 We used the Infomap method(20) to detect the community structures in the

411 mobility network. Briefly, considering the sequence of communities visited by

412 a random walker who will tend to linger within communities, the algorithm

413 detects the community based on the probability distribution of random walks.

414 A community partition is regarded as good if the description of that sequence

415 requires relatively little information, in the sense of Shannon entropy, and the

416 Infomap method is built to optimize the minimum description length of the

417 random walk on the network. Compared with other methods, this approach

418 retains the information about the directions and weights of the edges, which

419 has the advantage of being flexible for finding community structures on large

420 weighted and directed networks(27, 28). To assess community detection, we

421 calculate the modularity(29). As an index of the difference of connectivity

422 within a community versus between-communities, a relatively lower

423 modularity value indicates a higher strength of connections between different

424 communities rather than within the same community.

425

426 The same methods were used to analyze the mobility networks and

427 community structures by demographic characteristics by subsetting the

428 dataset to consider only mobility flows for the analyzed population group.

429

### 430 **Ethical Considerations**

431 This study was approved by the institutional review board of the School of

432 Public Health, Fudan University (IRB# 2022-05-0969).

433

434 **Data Availability.** Mobile phone data are proprietary and confidential. We

435 obtained access to these data from the SmartSteps company controlled by

436 China Unicom within the framework of the COVID-19 research project. To  
437 safeguard the privacy of the users, CSD was aggregated over time and  
438 space scale and by users' age group and sex(30). Raw mobility data cannot  
439 be made publicly available to preserve privacy. Grid-level data to reproduce  
440 the findings of this study can be requested from the corresponding author.

441

442 **Code availability.** The code will be made available on GitHub upon  
443 acceptance of the manuscript.

444

#### 445 **Acknowledgments**

446 H.Y. acknowledges financial support from the Key Program of the National  
447 Natural Science Foundation of China (No. 82130093). X.L. is supported by  
448 the National Nature Science Foundation of China (No. 72025405, 72001211,  
449 82041020, 72088101), National Social Science Foundation of China (No.  
450 22ZDA102), and the Hunan Science and Technology Plan Project (No.  
451 2020TP1013). J.Z. is supported by the Shanghai Rising-Star Program (No.  
452 22QA1402300).

453

#### 454 **References**

- 455 1. J. Liu, M. Liu, W. Liang, The Dynamic COVID-Zero Strategy in China. *China.*  
456 *CDC. Wkly.* **4**, 74-75 (2022).
- 457 2. Johns Hopkins University (2023) COVID-19 Dashboard.  
458 (<https://coronavirus.jhu.edu/region/china>).
- 459 3. Z. Chen *et al.*, Epidemiological characteristics and transmission dynamics of  
460 the outbreak caused by the SARS-CoV-2 Omicron variant in Shanghai,  
461 China: A descriptive study. *Lancet Reg. Health. West. Pac.* **29**, 100592  
462 (2022).
- 463 4. National Health Commission of the People's Republic of China (2022)  
464 Update on the COVID-19 policys in China.  
465 ([http://www.nhc.gov.cn/xcs/gzccwj/202212/8278e7a7aee34e5bb378f0e0fc9](http://www.nhc.gov.cn/xcs/gzccwj/202212/8278e7a7aee34e5bb378f0e0fc94e0f0.shtml)  
466 [4e0f0.shtml](http://www.nhc.gov.cn/xcs/gzccwj/202212/8278e7a7aee34e5bb378f0e0fc94e0f0.shtml)).
- 467 5. C. Viboud *et al.*, Synchrony, waves, and spatial hierarchies in the spread of  
468 influenza. *Science* **312**, 447-451 (2006).
- 469 6. M. Chinazzi *et al.*, The effect of travel restrictions on the spread of the 2019  
470 novel coronavirus (COVID-19) outbreak. *Science* **368**, 395-400 (2020).
- 471 7. A. Aleta *et al.*, Modelling the impact of testing, contact tracing and household  
472 quarantine on second waves of COVID-19. *Nat. Hum. Behav.* **4**, 964-971  
473 (2020).
- 474 8. N. M. Ferguson *et al.*, Strategies for mitigating an influenza pandemic.  
475 *Nature* **442**, 448-452 (2006).
- 476 9. S. Merler, M. Ajelli, The role of population heterogeneity and human mobility  
477 in the spread of pandemic influenza. *Proc. Biol. Sci.* **277**, 557-565 (2010).
- 478 10. J. Sills *et al.*, Aggregated mobility data could help fight COVID-19. *Science*  
479 **368**, 145-146 (2020).



- 480 11. J. S. Jia *et al.*, Population flow drives spatio-temporal distribution of  
481 COVID-19 in China. *Nature* 10.1038/s41586-020-2284-y (2020).
- 482 12. F. W. Crawford *et al.*, Impact of close interpersonal contact on COVID-19  
483 incidence: Evidence from 1 year of mobile device data. *Sci. Adv.* **8**, eabi5499  
484 (2022).
- 485 13. M. U. G. Kraemer *et al.*, The effect of human mobility and control measures  
486 on the COVID-19 epidemic in China. *Science* **368**, 493-497 (2020).
- 487 14. S. Chang *et al.*, Mobility network models of COVID-19 explain inequities and  
488 inform reopening. *Nature* **589**, 82-87 (2021).
- 489 15. P. Nouvellet *et al.*, Reduction in mobility and COVID-19 transmission. *Nat.*  
490 *Commun.* **12**, 1090 (2021).
- 491 16. W. Zheng *et al.*, Risk Factors Associated with the Spatiotemporal Spread of  
492 the SARS-CoV-2 Omicron BA. 2 Variant—Shanghai Municipality, China,  
493 2022. *China. CDC. Wkly.* **5**, 97-102 (2023).
- 494 17. F. Schlosser *et al.*, COVID-19 lockdown induces disease-mitigating  
495 structural changes in mobility networks. *Proc. Natl. Acad. Sci. U.S.A.* **117**,  
496 32883-32890 (2020).
- 497 18. H. S. Badr *et al.*, Association between mobility patterns and COVID-19  
498 transmission in the USA: a mathematical modelling study. *Lancet Infect. Dis.*  
499 **20**, 1247-1254 (2020).
- 500 19. S. Lai *et al.*, Effect of non-pharmaceutical interventions to contain COVID-19  
501 in China. *Nature* **585**, 410-413 (2020).
- 502 20. M. Rosvall, C. T. Bergstrom, Maps of random walks on complex networks  
503 reveal community structure. *Proc. Natl. Acad. Sci. U.S.A.* **105**, 1118-1123  
504 (2008).
- 505 21. B. Klein *et al.*, Characterizing collective physical distancing in the US during  
506 the first nine months of the COVID-19 pandemic. *arXiv preprint*  
507 *arXiv:2212.08873*, (2022).
- 508 22. A. Aleta *et al.*, Quantifying the importance and location of SARS-CoV-2  
509 transmission events in large metropolitan areas. *Proc. Natl. Acad. Sci. U.S.A.*  
510 **119**, e2112182119 (2022).
- 511 23. China Internet Network Information Center (2022) The 49th Statistical  
512 Report on China's Internet Development.
- 513 24. G. Pullano, E. Valdano, N. Scarpa, S. Rubrichi, V. Colizza, Evaluating the  
514 effect of demographic factors, socioeconomic factors, and risk aversion on  
515 mobility during the COVID-19 epidemic in France under lockdown: a  
516 population-based study. *Lancet Digit. Health.* **2**, e638-e649 (2020).
- 517 25. M. Manica *et al.*, Impact of tiered restrictions on human activities and the  
518 epidemiology of the second wave of COVID-19 in Italy. *Nat. Commun.* **12**,  
519 4570 (2021).
- 520 26. H. Gibbs *et al.*, Detecting behavioural changes in human movement to  
521 inform the spatial scale of interventions against COVID-19. *PLoS Comput.*  
522 *Biol.* **17**, e1009162 (2021).

- 523 27. A. Lancichinetti, S. Fortunato, Community detection algorithms: a  
524 comparative analysis. *Phys. Rev. E* **80**, 056117 (2009).  
525 28. S. Fortunato, Community detection in graphs. *Phys. Rep.* **486**, 75-174  
526 (2010).  
527 29. M. E. Newman, Fast algorithm for detecting community structure in networks.  
528 *Phys. Rev. E* **69**, 066133 (2004).  
529 30. Smartsteps (<http://www.smartsteps.com>).  
530

531 **Figures**

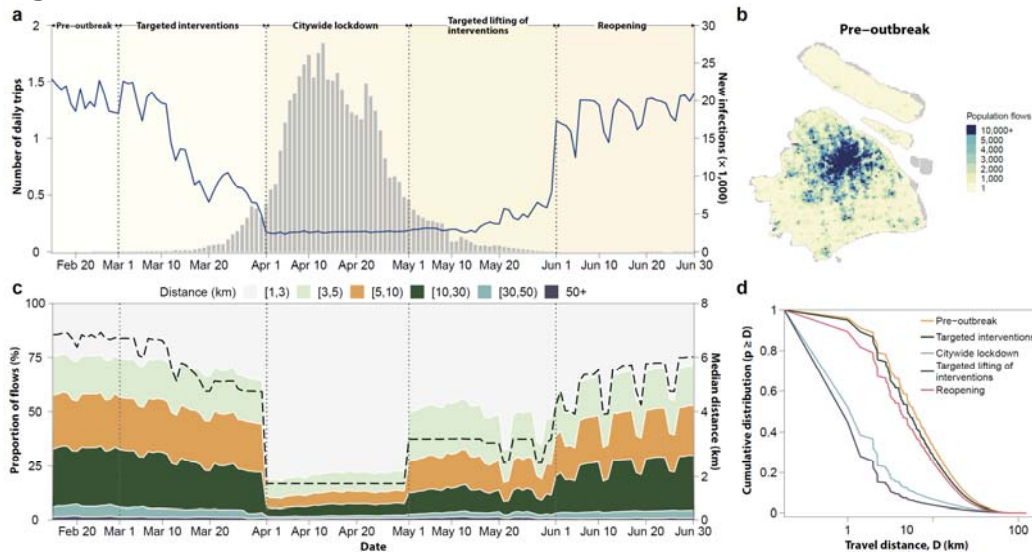

532

533

**Figure 1. Changes in population flows and travel distance in Shanghai.**

534

**a.** Changes in number of daily trips and number of new infections reported

535

from February 15 to June 30, 2022. Grey bars represent the daily reported

536

infections. **b.** The geographic distribution of population trips during the

537

pre-outbreak phase. The color intensity represents the number of daily trips

538

occurred in each cell. **c.** The proportion of daily trips by different distances

539

travelled (filled colors) and median distance of daily trips (dotted line) from

540

February 15 to June 30, 2022. **d.** The cumulative probability distribution

541

against distance (log) of daily trips across all five phases, where  $p$  is defined

542

as the probability of traveling between locations at a certain distance. Each

543

line represents the probability distribution per phase.

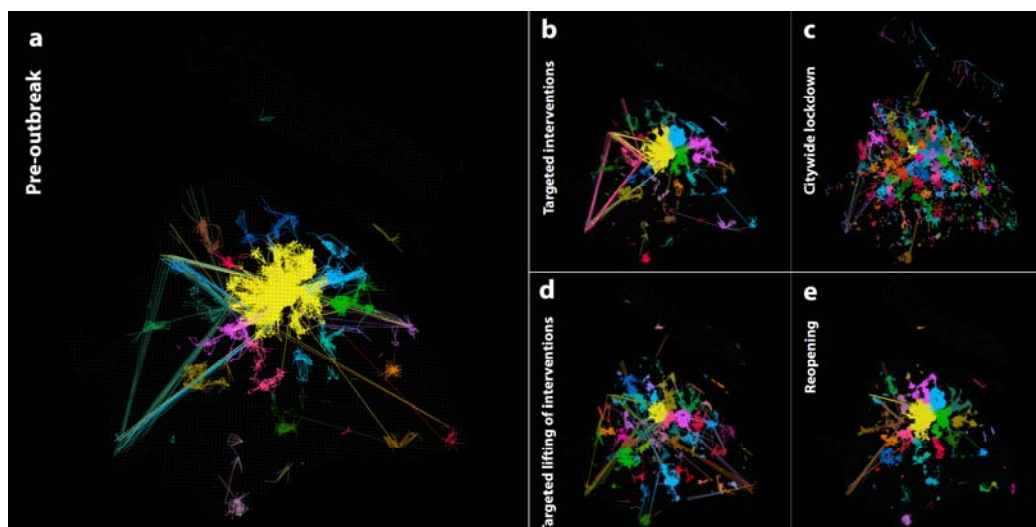

544

545 **Figure 2. The network structural changes during each phase.**

546 **a-e.** The community structure of pre-outbreak, targeted interventions,  
547 citywide lockdown, targeted lifting of interventions, and reopening phases,  
548 respectively. The mobility network is visualized with the top 10,000 edges  
549 sorted by weight in descending order. The color of the edges illustrates the  
550 community partitions of the grid.

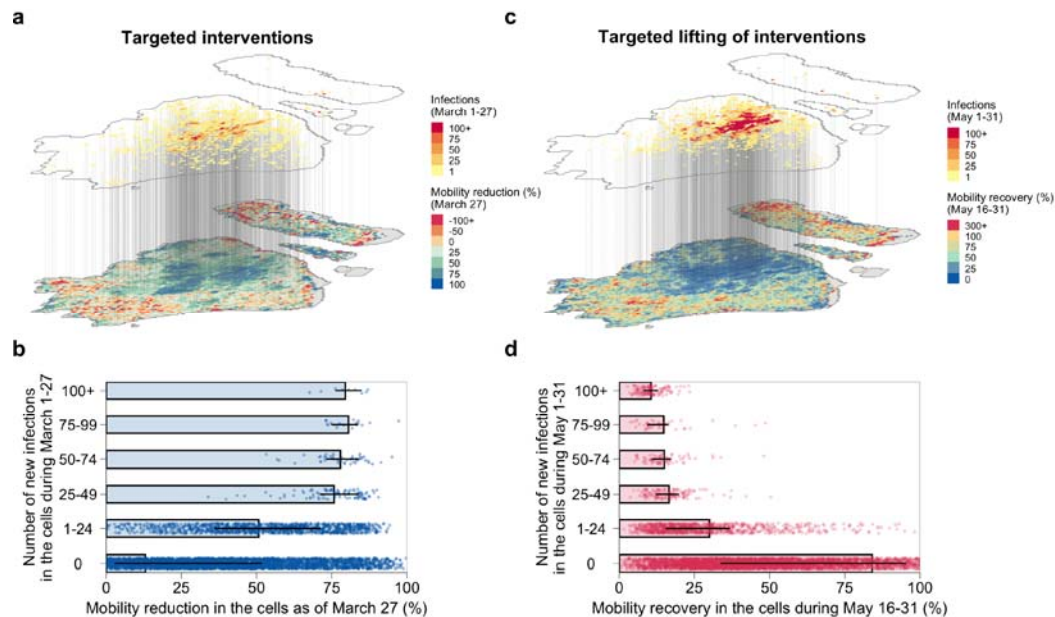

551

552 **Figure 3. Impact of epidemic and interventions on the changes in**  
553 **mobility.**

554 **a.** The geographic distribution of infections and mobility reduction during the  
555 targeted interventions phase. The upper map represents the cumulative  
556 number of infections at the grid level as of March 27 (i.e., before the  
557 lockdown of eastern Shanghai). The lower map represents the mobility  
558 reduction, which is computed as the subtraction of daily trips on March 27  
559 from the pre-outbreak mobility level, divided by the pre-outbreak mobility  
560 level. **b.** The mobility reduction as a function of number of new infections in  
561 the cells during the targeted interventions phase. The bar represents the  
562 mean value, while the horizontal line represents 50% quantile intervals. Each  
563 dot corresponds to the result for each cell. Note that the dots with a negative  
564 mobility reduction were not displayed. **c.** The geographic distribution of  
565 infections and mobility recovery during the targeted lifting of interventions  
566 phase. The upper map represents the cumulative number of infections at the  
567 grid level from May 1 to May 31. The lower map represents the mobility  
568 recovery, which is computed as the daily average trips between May 16 and  
569 May 31 divided by the pre-outbreak mobility level. The recovery may be  
570 beyond 100% if the daily trips during May 16 and May 31 are higher than the  
571 pre-outbreak mobility level. **d.** The same as panel b, but for the targeted  
572 lifting of interventions phase. Note that the dots with a mobility recovery  
573 beyond 100% were not displayed.

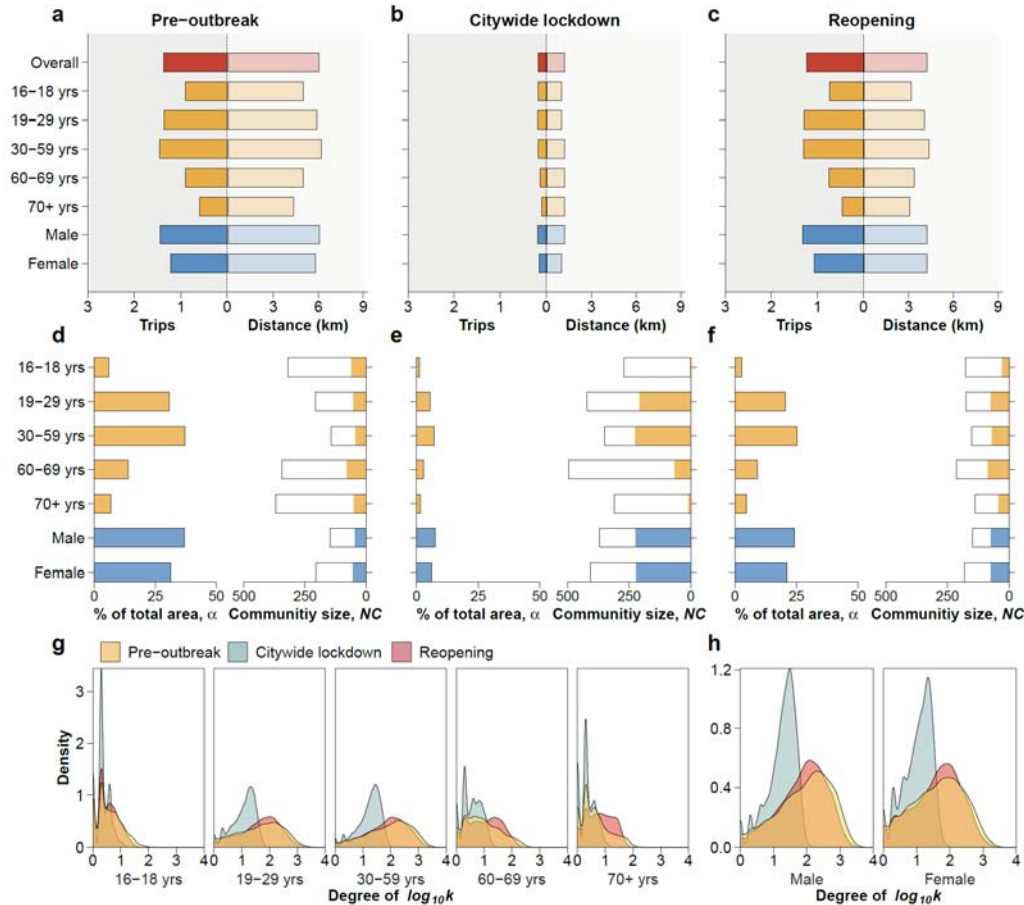

574

575 **Figure 4. Changes in frequency, distance, and community structures of**  
 576 **mobility network by age and sex.**

577 **a-c.** Mean number of daily trips and median distance travelled by age group  
 578 and sex during the pre-outbreak, citywide lockdown, and reopening phases.  
 579 Summary of frequency and distance across phases is shown in SI Appendix,  
 580 Table S4-5. **d-f.** The left part of each panel represents the proportion  $\alpha$ , i.e.,  
 581 the top-10 communities in terms of area ( $1 \text{ km}^2$ ) for each category to the total  
 582 area ( $7,355 \text{ km}^2$ ). The right part of each panel represents the number of  
 583 identified communities. The filled portions represent the number of  
 584 communities that spans more than 10 grids ( $NC_{g \geq 10}$ ), while the black box  
 585 represents the overall number of communities ( $NC$ ). **g-h.** The degree  
 586 distribution of the mobility network across phases by age group and sex.  
 587 Summary of the topological features of the mobility networks by age group  
 588 and sex is shown in SI Appendix, Table S6.
